# Supplementary material
Source: ML conference proceedings conference paper supplement (https://proceedings.mlr.press/v119/wachi20a.html)
Supplement: Supplementary file 1 [file wachi20a-supp.pdf]

## Appendices

### A. Definitions

We repeat the relevant definitions in our paper.

**A1. Safe Space:** For more details, see [Turchetta et al. \(2016\)](#).

Set of the states identified as safe up to some confidence level of  $\epsilon_g$ :

$$R_{\epsilon_g}^{\text{safe}}(X) = X \cup \{s \in \mathcal{S} \mid \exists s' \in X : g(s') - \epsilon_g - Ld(s, s') \geq h\}.$$

Set of states with reachability from  $X$ :

$$R_{\text{reach}}(X) = X \cup \{s \in \mathcal{S} \mid \exists s' \in X, a \in \mathcal{A}(s') : s = f(s', a)\}.$$

Set of states with returnability to  $X$ :

$$\begin{aligned} R_{\text{ret}}(X, \bar{X}) &= \bar{X} \cup \{s \in X \mid \exists a \in \mathcal{A} : f(s, a) \in \bar{X}\}, \\ R_{\text{ret}}^n(X, \bar{X}) &= R_{\text{ret}}(X, R_{\text{ret}}^{n-1}(X, \bar{X})), \text{ with } R_{\text{ret}}^1(X, \bar{X}) = R_{\text{ret}}(X, \bar{X}), \\ \bar{R}_{\text{ret}}(X, \bar{X}) &= \lim_{n \rightarrow \infty} R_{\text{ret}}^n(X, \bar{X}). \end{aligned}$$

Set of safe states with reachability and returnability:

$$\begin{aligned} R_{\epsilon_g}(X) &= R_{\epsilon_g}^{\text{safe}}(X) \cap R_{\text{reach}}(X) \cap R_{\text{ret}}(R_{\epsilon_g}^{\text{safe}}(X), X), \\ R_{\epsilon_g}(X) &= R_{\epsilon_g}(R_{\epsilon_g}^{n-1}(X)), \text{ with } R_{\epsilon_g}^1(X) = R_{\epsilon_g}(X), \\ \bar{R}_{\epsilon_g}(X) &= \lim_{n \rightarrow \infty} R_{\epsilon_g}^n(X). \end{aligned}$$

Pessimistic safe space:

$$\begin{aligned} S_t^- &= \{s \in \mathcal{S} \mid \exists s' \in \mathcal{X}_{t-1}^- : l_t(s') - L \cdot d(s, s') \geq h\}, \\ \mathcal{X}_t^- &= \{s \in S_t^- \mid s \in R_{\text{reach}}(\mathcal{X}_{t-1}^-) \cap \bar{R}_{\text{ret}}(S_t^-, \mathcal{X}_{t-1}^-)\}. \end{aligned}$$

Optimistic safe space:

$$\begin{aligned} S_t^+ &= \{s \in \mathcal{S} \mid \exists s' \in \mathcal{X}_{t-1}^+ : u_t(s') - L \cdot d(s, s') \geq h\}, \\ \mathcal{X}_t^+ &= \{s \in S_t^+ \mid s \in R_{\text{reach}}(\mathcal{X}_{t-1}^+) \cap \bar{R}_{\text{ret}}(S_t^+, \mathcal{X}_{t-1}^+)\}. \end{aligned}$$

### A2. Optimization of Cumulative Reward

For optimal policy:

$$V_{\mathcal{M}}^*(s_t) = \max_{s_{t+1} \in R_{\epsilon_g}(S_0)} [r(s_{t+1}) + \gamma V_{\mathcal{M}}^*(s_{t+1})].$$

For balancing exploration and exploitation (neither ES<sup>2</sup> nor P-ES<sup>2</sup> is used):

$$\begin{aligned} U_t(s) &= \mu_t^r(s) + \alpha_{t+1}^{1/2} \cdot \sigma_t^r(s), \\ J_{\mathcal{X}}^*(s_t, \mathbf{b}_t^r, \mathbf{b}_t^g) &= \max_{s_{t+1} \in \mathcal{X}_t^*} [U_t(s_{t+1}) + \gamma J_{\mathcal{X}}^*(s_{t+1}, \mathbf{b}_t^r, \mathbf{b}_t^g)]. \end{aligned}$$

### A3. ES<sup>2</sup> Algorithm

For checking whether the termination condition is satisfied:

$$\begin{aligned} V_{\mathcal{M}_y}(\mathbf{s}_t) &= \max_{\mathbf{s}_{t+1} \in \mathcal{X}_t^+} [r'(\mathbf{s}_{t+1}) + \gamma V_{\mathcal{M}_y}(\mathbf{s}_{t+1})], \\ \mathcal{Y}_t &= \{\mathbf{s}' \in \mathcal{S}^+ \mid \forall \mathbf{s} \in \mathcal{X}_t^- : \mathbf{s}' = f(\mathbf{s}, \pi_y^*(a \mid \mathbf{s}))\}, \\ \mathcal{Y}_t &\subseteq \mathcal{X}_t^-. \end{aligned}$$

For balancing exploration and exploitation in terms of reward:

$$J_{\mathcal{Y}}^*(\mathbf{s}_t, \mathbf{b}_t^r, \mathbf{b}_t^g) = \max_{\mathbf{s}_{t+1} \in \mathcal{Y}_t} [U_t(\mathbf{s}_{t+1}) + \gamma J_{\mathcal{Y}}^*(\mathbf{s}_{t+1}, \mathbf{b}_t^r, \mathbf{b}_t^g)].$$

### A4. P-ES<sup>2</sup> Algorithm

For checking whether the termination condition is satisfied:

$$\begin{aligned} V_{\mathcal{M}_z}(\mathbf{s}_t) &= \max_{\mathbf{s}_{t+1} \in \mathcal{X}_t^+} [P^z \cdot \{r'(\mathbf{s}_{t+1}) + \gamma V_{\mathcal{M}_z}(\mathbf{s}_{t+1})\}], \\ \mathcal{Z}_t &= \{\mathbf{s}' \in \mathcal{S}^+ \mid \forall \mathbf{s} \in \mathcal{X}_t^- : \mathbf{s}' = f(\mathbf{s}, \pi_z^*(a \mid \mathbf{s}))\}, \\ \mathcal{Z}_t &\subseteq \mathcal{X}_t^-. \end{aligned}$$

For balancing exploration and exploitation in terms of the reward:

$$J_{\mathcal{Z}}^*(\mathbf{s}_t, \mathbf{b}_t^r, \mathbf{b}_t^g) = \max_{\mathbf{s}_{t+1} \in \mathcal{Z}_t} [U_t(\mathbf{s}_{t+1}) + \gamma J_{\mathcal{Z}}^*(\mathbf{s}_{t+1}, \mathbf{b}_t^r, \mathbf{b}_t^g)].$$

## B. Preliminary Lemma

**Lemma 3.** For two arbitrary functions  $f_1(x)$  and  $f_2(x)$ , the following inequality holds:

$$\max_x f_1(x) - \max_x f_2(x) \geq \min_x (f_1(x) - f_2(x)).$$

*Proof.* For two arbitrary functions  $f_4(x)$  and  $f_5(x)$ , the following inequality holds:

$$\max_x f_4(x) + \max_x f_5(x) \geq \max_x \{f_4(x) + f_5(x)\}.$$

Let  $f_2(x) = f_4(x) + f_5(x)$  and  $f_3(x) = -f_4(x)$ . Then,

$$\begin{aligned} \max_x \{-f_3(x)\} + \max_x \{f_2(x) + f_3(x)\} &\geq \max_x f_2(x), \\ \max_x \{f_2(x) + f_3(x)\} - \max_x f_2(x) &\geq -\max_x \{-f_3(x)\}, \\ \max_x \{f_2(x) + f_3(x)\} - \max_x f_2(x) &= \min_x f_3(x). \end{aligned}$$

Finally, let  $f_1(x) = f_2(x) + f_3(x)$ . Then, the desired lemma is obtained.  $\square$

## C. Near-optimality

**Lemma 4.** Let  $J_{\mathcal{X}}^*(\mathbf{s}_t, \mathbf{b}_t^r, \mathbf{b}_t^g)$  be the value function calculated by SNO-MDP without the ES<sup>2</sup> algorithm. Then,  $J_{\mathcal{X}}^*(\mathbf{s}_t, \mathbf{b}_t^r, \mathbf{b}_t^g)$  satisfies the following inequality:

$$J_{\mathcal{X}}^*(\mathbf{s}_t, \mathbf{b}_t^r, \mathbf{b}_t^g) \geq V^*(\mathbf{s}_t).$$

*Proof.* Consider a state  $\mathbf{s}_t$  and beliefs  $\mathbf{b}_t^r$  and  $\mathbf{b}_t^g$ . Also, let  $I$  denote the following safety indicator function:

$$I(\mathbf{s}) := \begin{cases} 1 & \text{if } \mathbf{s} \in \bar{R}_{\epsilon_g}(S_0), \\ 0 & \text{otherwise.} \end{cases} \quad (5)$$

Then, the following chain of equations and inequalities holds:

$$\begin{aligned}
 & J_{\mathcal{X}}^*(\mathbf{s}_t, \mathbf{b}_t^r, \mathbf{b}_t^g) - V^*(\mathbf{s}_t) \\
 &= \max_{\mathbf{s}_{t+1} \in \mathcal{X}_{t^*}^-} [U_t(\mathbf{s}_{t+1}) + \gamma J_{\mathcal{X}}^*(\mathbf{s}_{t+1}, \mathbf{b}_t^r, \mathbf{b}_t^g)] - \max_{\mathbf{s}_{t+1} \in \bar{R}_{\epsilon_g}(S_0)} [r(\mathbf{s}_{t+1}) + \gamma V_{\mathcal{M}}^*(\mathbf{s}_{t+1})] \\
 &\geq \max_{\mathbf{s}_{t+1} \in \bar{R}_{\epsilon_g}(S_0)} [U_t(\mathbf{s}_{t+1}) + \gamma J_{\mathcal{X}}^*(\mathbf{s}_{t+1}, \mathbf{b}_t^r, \mathbf{b}_t^g)] - \max_{\mathbf{s}_{t+1} \in \bar{R}_{\epsilon_g}(S_0)} [r(\mathbf{s}_{t+1}) + \gamma V_{\mathcal{M}}^*(\mathbf{s}_{t+1})] \\
 &= \max_{a_t} [I(\mathbf{s}_{t+1}) \cdot \{U_t(\mathbf{s}_{t+1}) + \gamma J_{\mathcal{X}}^*(\mathbf{s}_{t+1}, \mathbf{b}_t^r, \mathbf{b}_t^g)\}] - \max_{a_t} [I(\mathbf{s}_{t+1}) \cdot \{r(\mathbf{s}_{t+1}) + \gamma V_{\mathcal{M}}^*(\mathbf{s}_{t+1})\}] \\
 &\geq \min_{a_t} [I(\mathbf{s}_{t+1}) \cdot \{U_t(\mathbf{s}_{t+1}) - r(\mathbf{s}_{t+1})\}] + \gamma I(\mathbf{s}_{t+1}) J_{\mathcal{X}}^*(\mathbf{s}_{t+1}, \mathbf{b}_t^r, \mathbf{b}_t^g) - \gamma I(\mathbf{s}_{t+1}) V^*(\mathbf{s}_{t+1}) \\
 &= \min_{a_t} [I(\mathbf{s}_{t+1}) \cdot \{U_t(\mathbf{s}_{t+1}) - r(\mathbf{s}_{t+1})\}] + \gamma I(\mathbf{s}_{t+1}) \{J_{\mathcal{X}}^*(\mathbf{s}_{t+1}, \mathbf{b}_t^r, \mathbf{b}_t^g) - V^*(\mathbf{s}_{t+1})\}.
 \end{aligned}$$

The third line follows from  $\mathcal{X}_{t^*}^- \supseteq \bar{R}_{\epsilon_g}(S_0)$  in Theorem 1. Also, the fourth line follows from the definition of  $I$ , and the fifth line follows from Lemma 3. Because  $\mathbf{s}$  is arbitrary in the above derivation, we have

$$\min_{\mathbf{s}_t} [J_{\mathcal{X}}^*(\mathbf{s}_t, \mathbf{b}_t^r, \mathbf{b}_t^g) - V^*(\mathbf{s}_t)] \geq \min_{\mathbf{s}_{t+1}} [I(\mathbf{s}_{t+1}) \{U_t(\mathbf{s}_{t+1}) - r(\mathbf{s}_{t+1})\} + \gamma I(\mathbf{s}_{t+1}) \{J_{\mathcal{X}}^*(\mathbf{s}_{t+1}, \mathbf{b}_t^r, \mathbf{b}_t^g) - V^*(\mathbf{s}_{t+1})\}].$$

By Lemma 2, the following equation holds with probability at least  $1 - \Delta^r$ :

$$\min_{\mathbf{s}_t} [J_{\mathcal{X}}^*(\mathbf{s}_t, \mathbf{b}_t^r, \mathbf{b}_t^g) - V^*(\mathbf{s}_t, \mathbf{b}_t^r, \mathbf{b}_t^g)] \geq \gamma \cdot \min_{\mathbf{s}_{t+1}} [I(\mathbf{s}_{t+1}) \{J_{\mathcal{X}}^*(\mathbf{s}_{t+1}, \mathbf{b}_t^r, \mathbf{b}_t^g) - V^*(\mathbf{s}_{t+1})\}]$$

Repeatedly applying this equation proves the desired lemma. Therefore, we have

$$J_{\mathcal{X}}^*(\mathbf{s}_t, \mathbf{b}_t^r, \mathbf{b}_t^g) \geq V^*(\mathbf{s}_t)$$

with high probability. □

**Lemma 5. (Generalized induced inequality)** Let  $\mathbf{b}^r, \mathbf{b}^g, r$  and  $\hat{\mathbf{b}}^r, \hat{\mathbf{b}}^g, \hat{r}$  be the beliefs (over reward and safety, respectively) and reward functions (including the exploration bonus) that are identical on some set of states  $\Omega$  — i.e.,  $\mathbf{b}^r = \hat{\mathbf{b}}^r, \mathbf{b}^g = \hat{\mathbf{b}}^g$ , and  $r = \hat{r}$  for all  $\mathbf{s} \in \Omega$ . Let  $P(A_\Omega)$  be the probability that a state not in  $\Omega$  is generated when starting from state  $\mathbf{s}$  and following a policy  $\pi$ . If the value is bound in  $[0, V_{\max}]$ , then

$$V^\pi(\mathbf{s}, \mathbf{b}^r, \mathbf{b}^g, r) \geq V^\pi(\mathbf{s}, \hat{\mathbf{b}}^r, \hat{\mathbf{b}}^g, \hat{r}) - V_{\max} P(A_\Omega),$$

where we now make explicit the dependence of the value function on the reward.

*Proof.* The lemma follows from Lemma 8 in Strehl & Littman (2005). □

**Lemma 6.** Assume that the reward function  $r$  satisfies  $\|r\|_k^2 \leq B^r$ , and that the noise  $n_t^r$  is  $\sigma_r$ -sub-Gaussian. If  $\alpha_t = B^r + \sigma_r \sqrt{2(\Gamma_{t-1}^r + 1 + \log(1/\Delta^r))}$  and  $C_r = 8/\log(1 + \sigma_r^{-2})$ , then the following holds:

$$\frac{1}{2} \sqrt{\frac{C_r \alpha_{t^*} \Gamma_{t^*}^r}{t^*}} \geq \alpha_{t^*}^{1/2} \sigma_{t^*}^r(\mathbf{s}),$$

with probability at least  $1 - \Delta^r$ .

*Proof.* The lemma follows from Lemma 4 in Chowdhury & Gopalan (2017). □

## D. ES<sup>2</sup> algorithm

**Lemma 7.** Assume that  $\mathcal{Y}_t \subseteq \mathcal{X}_t^-$  holds. Suppose that we obtain the optimal policy,  $\pi_y^*$  on the basis of  $J_y^*(\mathbf{s}_t, \mathbf{b}_t^r, \mathbf{b}_t^g) = \max_{\mathbf{s}_{t+1} \in \mathcal{Y}_t} [U_t(\mathbf{s}_{t+1}) + \gamma J_y^*(\mathbf{s}_{t+1}, \mathbf{b}_t^r, \mathbf{b}_t^g)]$ . Then, for all  $t$ , the following holds:

$$\mathbf{s}_t \in \mathcal{Y}_t \implies \mathbf{s}_{t+1} \in \mathcal{Y}_t.$$

*Proof.* When  $\mathcal{Y}_t \subseteq \mathcal{X}_t^-$  holds, we have

$$\begin{aligned} \{s' \in \mathcal{S}^+ \mid \forall s \in \mathcal{Y}_t : s' = f(s, \pi_y^*(a \mid s))\} &\subseteq \{s' \in \mathcal{S}^+ \mid \forall s \in \mathcal{X}_t^- : s' = f(s, \pi_y^*(a \mid s))\} \\ &= \mathcal{Y}_t. \end{aligned}$$

This means that the next state  $s_{t+1}$  will be within  $\mathcal{Y}_t$  if the agent is in  $\mathcal{Y}_t$  and decides the action based on  $\pi_y^*$ . Therefore, we have the desired lemma.  $\square$

**Lemma 8.** Assume that  $\mathcal{Y}_t \subseteq \mathcal{X}_t^-$  holds, and let  $J_{\mathcal{Y}}^*(s_t, \mathbf{b}_t^r, \mathbf{b}_t^g)$  be the value function calculated by SNO-MDP with the ES<sup>2</sup> algorithm. Then, for all  $s_t \in \mathcal{X}_t^-$ ,  $J_{\mathcal{Y}}^*(s_t, \mathbf{b}_t^r, \mathbf{b}_t^g)$  satisfies the following equation:

$$J_{\mathcal{Y}}^*(s_t, \mathbf{b}_t^r, \mathbf{b}_t^g) \geq V^*(s_t).$$

*Proof.* Consider a state  $s_t \in \mathcal{X}_t^-$  and beliefs  $\mathbf{b}^r$  and  $\mathbf{b}^g$ . Also, we define the function  $I$  as in (5). Then, the following chain of the equations and inequalities holds:

$$\begin{aligned} &J_{\mathcal{Y}}^*(s_t, \mathbf{b}_t^r, \mathbf{b}_t^g) - V^*(s_t) \\ &= \max_{s_{t+1} \in \mathcal{Y}_t} [U_t(s_{t+1}) + \gamma J_{\mathcal{Y}}^*(s_{t+1}, \mathbf{b}_t^r, \mathbf{b}_t^g)] - \max_{a_t} [I(s_{t+1}) \cdot \{r(s_{t+1}) + \gamma V_{\mathcal{M}}^*(s_{t+1})\}] \\ &= \max_{s_{t+1} \in \mathcal{Y}_t} [U_t(s_{t+1}) + \gamma J_{\mathcal{Y}}^*(s_{t+1}, \mathbf{b}_t^r, \mathbf{b}_t^g)] - \max_{s_{t+1} \in \mathcal{X}_t^+} [I(s_{t+1}) \cdot \{r(s_{t+1}) + \gamma V_{\mathcal{M}}^*(s_{t+1})\}] \\ &= \max_{s_{t+1} \in \mathcal{Y}_t} [U_t(s_{t+1}) + \gamma J_{\mathcal{Y}}^*(s_{t+1}, \mathbf{b}_t^r, \mathbf{b}_t^g)] - \max_{s_{t+1} \in \mathcal{Y}_t} [I(s_{t+1}) \cdot \{r(s_{t+1}) + \gamma V_{\mathcal{M}}^*(s_{t+1})\}] \\ &\geq \min_{s_{t+1} \in \mathcal{Y}_t} [U_t(s_{t+1}) + \gamma J_{\mathcal{Y}}^*(s_{t+1}, \mathbf{b}_t^r, \mathbf{b}_t^g) - I(s_{t+1}) \cdot \{r(s_{t+1}) + \gamma V_{\mathcal{M}}^*(s_{t+1})\}] \\ &\geq \min_{s_{t+1} \in \mathcal{Y}_t} [U_t(s_{t+1}) + \gamma J_{\mathcal{Y}}^*(s_{t+1}, \mathbf{b}_t^r, \mathbf{b}_t^g) - \{r(s_{t+1}) + \gamma V_{\mathcal{M}}^*(s_{t+1})\}] \\ &= \min_{s_{t+1} \in \mathcal{Y}_t} [U_t(s_{t+1}) - r(s_{t+1}) + \gamma J_{\mathcal{Y}}^*(s_{t+1}, \mathbf{b}_t^r, \mathbf{b}_t^g) - \gamma V_{\mathcal{M}}^*(s_{t+1})]. \end{aligned}$$

The second and third lines follow from the definitions of  $I$  and  $V_{\mathcal{M}}^*$ . The fourth line follows from the definition of  $\mathcal{Y}$  and the assumption of  $\mathcal{Y}_t \subseteq \mathcal{X}_t^-$ . The fifth line follows from Lemma 3.

Then, by Lemma 2, the following equation holds with probability at least  $1 - \Delta^r$ :

$$\begin{aligned} \min_{s_t \in \mathcal{X}_t^-} [J_{\mathcal{Y}}^*(s_t, \mathbf{b}_t^r, \mathbf{b}_t^g) - V^*(s_t)] &\geq \gamma \cdot \min_{s_{t+1} \in \mathcal{Y}_t} [J_{\mathcal{Y}}^*(s_{t+1}, \mathbf{b}_t^r, \mathbf{b}_t^g) - V_{\mathcal{M}}^*(s_{t+1})] \\ &\geq \gamma^2 \cdot \min_{s_{t+2} \in \mathcal{Y}_t} [J_{\mathcal{Y}}^*(s_{t+2}, \mathbf{b}_t^r, \mathbf{b}_t^g) - V_{\mathcal{M}}^*(s_{t+2})]. \end{aligned}$$

The second line follows from Lemma 7. Repeatedly applying this equation proves the desired lemma. Therefore, for all  $s_t \in \mathcal{X}_t^-$ , we have

$$J_{\mathcal{Y}}^*(s_t, \mathbf{b}_t^r, \mathbf{b}_t^g) \geq V^*(s_t). \quad \square$$

## E. Main Theoretical Results

**Theorem 1.** Assume that the safety function  $g$  satisfies  $\|g\|_k^2 \leq B^g$  and is  $L$ -Lipschitz continuous. Also, assume that  $S_0 \neq \emptyset$  and  $g(s) \geq h$  for all  $s \in S_0$ . Fix any  $\epsilon_g > 0$  and  $\Delta^g \in (0, 1)$ . Suppose that we conduct the stage of “exploration of safety” with the noise  $n_t^g$  being  $\sigma_g$ -sub-Gaussian, and that  $\beta_t = B^g + \sigma_g \sqrt{2(\Gamma_{t-1}^g + 1 + \log(1/\Delta^g))}$  until  $\max_{s \in G_t} w_t(s) < \epsilon_g$  is achieved. Finally, let  $t^*$  be the smallest integer satisfying

$$\frac{t^*}{\beta_{t^*} \Gamma_{t^*}^g} \geq \frac{C_g |\bar{R}_0(S_0)|}{\epsilon_g^2} \cdot D(\mathcal{M}),$$

with  $C_g = 8/\log(1 + \sigma_g^{-2})$ . Then, the following statements jointly hold with probability at least  $1 - \Delta^g$ :

- $\forall t \geq 1, g(\mathbf{s}_t) \geq h,$
- $\exists t_0 \leq t^*, \bar{R}_{\epsilon_g}(S_0) \subseteq \mathcal{X}_{t_0}^- \subseteq \bar{R}_0(S_0).$

*Proof.* This is an extension of Theorem 1 in Turchetta et al. (2016) to our settings, where  $t$  represents not the number of samples but the number of actions.  $\square$

**Theorem 2.** Assume that the reward function  $r$  satisfies  $\|r\|_k^2 \leq B^r$ , and that the noise is  $\sigma_r$ -sub-Gaussian. Let  $\pi_t$  denote the policy followed by SNO-MDP at time  $t$ , and let  $\mathbf{s}_t$  and  $\mathbf{b}_t^r, \mathbf{b}_t^g$  be the corresponding state and beliefs, respectively. Let  $t^*$  be the smallest integer satisfying  $\frac{t^*}{\beta_{t^*} \Gamma_{t^*}^g} \geq \frac{C_g |\bar{R}_0(S_0)|}{\epsilon_g^2} D(\mathcal{M})$ , and fix any  $\Delta^r \in (0, 1)$ . Finally, set  $\alpha_t = B^r + \sigma_r \sqrt{2(\Gamma_{t-1}^r + 1 + \log(1/\Delta^r))}$  and

$$\epsilon_V^* = V_{\max} \cdot (\Delta^g + \Sigma_{t^*}^r / R_{\max}),$$

with  $\Sigma_{t^*}^r = \frac{1}{2} \sqrt{\frac{C_r \alpha_{t^*} \Gamma_{t^*}^r}{t^*}}$ . Then, with high probability,

$$V^{\pi_t}(\mathbf{s}_t, \mathbf{b}_t^r, \mathbf{b}_t^g) \geq V^*(\mathbf{s}_t) - \epsilon_V^*$$

— i.e., the algorithm is  $\epsilon_V^*$ -close to the optimal policy — for all but  $t^*$  time steps, while guaranteeing safety with probability at least  $1 - \Delta^g$ .

*Proof.* Define  $\tilde{r}$  as the reward function (including the exploration bonus) that is used by SNO-MDP. Let  $\hat{r}$  be a reward function equal to  $r$  on  $\Omega$  and equal to  $\tilde{r}$  elsewhere. Furthermore, let  $\tilde{\pi}$  be the policy followed by SNO-MDP at time  $t$ , that is, the policy calculated on the basis of the current beliefs, (i.e.,  $\mathbf{b}_t^r$  and  $\mathbf{b}_t^g$ ) and the reward  $\tilde{r}$ . Finally, let  $A_\Omega$  be the event in which  $\tilde{\pi}$  escapes from  $\Omega$ . Then,

$$V^{\pi_t}(r, \mathbf{s}_t, \mathbf{b}_t^r, \mathbf{b}_t^g) \geq V^{\tilde{\pi}}(\hat{r}, \mathbf{s}_t, \mathbf{b}_t^r, \mathbf{b}_t^g) - V_{\max} P(A_\Omega)$$

by Lemma 5. In addition, note that, for all  $t \geq t^*$ , because  $\hat{r}$  and  $\tilde{r}$  differ by at most  $\alpha_{t^*}^{1/2} \sigma_{t^*}^r$  at each state,

$$\begin{aligned} |V^{\tilde{\pi}}(\hat{r}, \mathbf{s}_t, \mathbf{b}_t^r, \mathbf{b}_t^g) - V^{\tilde{\pi}}(\tilde{r}, \mathbf{s}_t, \mathbf{b}_t^r, \mathbf{b}_t^g)| &\leq \frac{1}{1-\gamma} \cdot \alpha_{t^*}^{1/2} \sigma_{t^*}^r(\mathbf{s}) \\ &\leq V_{\max} / R_{\max} \cdot \Sigma_{t^*}^r. \end{aligned} \quad (6)$$

For the above inequality, we used Lemma 6. Here, consider the case of  $\Omega = \mathcal{X}_{t^*}^-$ . Once the safe region is fully explored,  $P(A_\Omega) \leq \Delta^g$  holds after  $t^*$  time steps. Then, the following chain of equations and inequalities holds:

$$\begin{aligned} V^{\pi_t}(R, \mathbf{s}, \mathbf{b}) &\geq V^{\tilde{\pi}}(\hat{R}, \mathbf{s}, \mathbf{b}) - V_{\max} \cdot P(A_\Omega) \\ &= V^{\tilde{\pi}}(\hat{R}, \mathbf{s}, \mathbf{b}) - V_{\max} \cdot P(A_{\mathcal{X}^-}) \\ &\geq V^{\tilde{\pi}}(\hat{R}, \mathbf{s}, \mathbf{b}) - V_{\max} \cdot \Delta^g \\ &\geq V^{\tilde{\pi}}(\tilde{R}, \mathbf{s}, \mathbf{b}) - V_{\max} \cdot (\Delta^g + \Sigma_{t^*}^r / R_{\max}) \\ &= J_{\mathcal{X}^-}^*(\tilde{R}, \mathbf{s}, \mathbf{b}) - V_{\max} \cdot (\Delta^g + \Sigma_{t^*}^r / R_{\max}) \\ &\geq V^*(R, \mathbf{s}) - V_{\max} \cdot (\Delta^g + \Sigma_{t^*}^r / R_{\max}). \end{aligned}$$

In this derivation, the second line follows from the assumption of  $\Omega = \mathcal{X}^-$ , the third line follows from  $P(A_{\mathcal{X}^-}) \leq \Delta^g$ , the fourth line follows from (6), the fifth line follows from the fact that  $\tilde{\pi}$  is precisely the optimal policy for  $\tilde{R}$  and  $\mathbf{b}$ , and the final line follows from Lemma 4.  $\square$

**Theorem 3.** Assume that the reward function  $r$  satisfies  $\|r\|_k^2 \leq B^r$ , and that the noise is  $\sigma_r$ -sub-Gaussian. Let  $\pi_t$  denote the policy followed by SNO-MDP with the ES<sup>2</sup> algorithm at time  $t$ , and let  $\mathbf{s}_t$  and  $\mathbf{b}_t^r, \mathbf{b}_t^g$  be the corresponding state and beliefs, respectively. Let  $\hat{t}$  be the smallest integer for which (4) holds, and fix any  $\Delta^r \in (0, 1)$ . Finally, set  $\alpha_t = B^r + \sigma_r \sqrt{2(\Gamma_{t-1}^r + 1 + \log(1/\Delta^r))}$  and

$$\tilde{\epsilon}_V = V_{\max} \cdot (\Delta^g + \Sigma_{\hat{t}}^r / R_{\max}),$$

with  $\Sigma_{\tilde{t}}^r = \frac{1}{2} \sqrt{\frac{C_r \alpha_{\tilde{t}} \Gamma_{\tilde{t}}^r}{\tilde{t}}}$ . Then, with high probability,

$$V^{\pi_t}(\mathbf{s}_t, \mathbf{b}_t^r, \mathbf{b}_t^g) \geq V^*(\mathbf{s}_t) - \tilde{\epsilon}_V$$

— i.e., the algorithm is  $\tilde{\epsilon}_V$ -close to the optimal policy — for all but  $\tilde{t}$  time steps while guaranteeing safety with probability at least  $1 - \Delta^g$ .

*Proof.* The proof of Theorem 3 is analogous to that of Theorem 2. Define  $\tilde{r}$  as the reward function (including the exploration bonus) that is used by SNO-MDP. Let  $\hat{r}$  be a reward function equal to  $r$  on  $\mathcal{Y}$  and equal to  $\tilde{r}$  elsewhere. Furthermore, let  $\tilde{\pi}$  be the policy followed by SNO-MDP with the ES<sup>2</sup> algorithm at time  $t$ , that is, the policy calculated on the basis of the current beliefs, (i.e.,  $\mathbf{b}_t^r$  and  $\mathbf{b}_t^g$ ) and the reward  $\tilde{r}$ . Finally, let  $A_{\mathcal{Y}}$  be the event in which  $\tilde{\pi}$  escapes from  $\mathcal{Y}$ . Then,

$$V^{\pi_t}(r, \mathbf{s}_t, \mathbf{b}_t^r, \mathbf{b}_t^g) \geq V^{\tilde{\pi}}(\hat{r}, \mathbf{s}_t, \mathbf{b}_t^r, \mathbf{b}_t^g) - V_{\max} P(A_{\mathcal{Y}})$$

by Lemma 5. In addition, note that, for all  $t \geq \tilde{t}$ , because  $\hat{r}$  and  $\tilde{r}$  differ by at most  $\alpha_{\tilde{t}}^{1/2} \sigma_{\tilde{t}}^r$  at each state,

$$\begin{aligned} |V^{\tilde{\pi}}(\hat{r}, \mathbf{s}_t, \mathbf{b}_t^r, \mathbf{b}_t^g) - V^{\tilde{\pi}}(\tilde{r}, \mathbf{s}_t, \mathbf{b}_t^r, \mathbf{b}_t^g)| &\leq \frac{1}{1 - \gamma} \cdot \alpha_{\tilde{t}}^{1/2} \sigma_{\tilde{t}}^r(\mathbf{s}) \\ &\leq V_{\max} / R_{\max} \cdot \Sigma_{\tilde{t}}^r. \end{aligned} \quad (7)$$

For the above inequalities, we used Lemma 6. Then, the following chain of equations and inequalities holds:

$$\begin{aligned} V^{\pi_t}(R, \mathbf{s}, \mathbf{b}) &= V^{\tilde{\pi}}(\hat{R}, \mathbf{s}, \mathbf{b}) - V_{\max} \cdot P(A_{\mathcal{Y}}) \\ &\geq V^{\tilde{\pi}}(\hat{R}, \mathbf{s}, \mathbf{b}) - V_{\max} \cdot \Delta^g \\ &\geq V^{\tilde{\pi}}(\tilde{R}, \mathbf{s}, \mathbf{b}) - V_{\max} \cdot (\Delta^g + \Sigma_{\tilde{t}}^r / R_{\max}) \\ &= J_{\mathcal{Y}}^*(\tilde{R}, \mathbf{s}, \mathbf{b}) - V_{\max} \cdot (\Delta^g + \Sigma_{\tilde{t}}^r / R_{\max}) \\ &\geq V^*(R, \mathbf{s}) - V_{\max} \cdot (\Delta^g + \Sigma_{\tilde{t}}^r / R_{\max}). \end{aligned}$$

In this derivation, the second line follows from  $P(A_{\mathcal{Y}}) \leq \Delta^g$ , the third line follows from (7), the fourth line follows from the fact that  $\tilde{\pi}$  is precisely the optimal policy for  $\tilde{R}$  and  $\mathbf{b}$ , and the final line follows from Lemma 8.  $\square$
